# Supplementary material for: Cycloaddition of styrene oxide and CO2 mediated by pyrolysis of urea
Source: Royal Society of Chemistry journal article supplement (doi:10.1039/c3ra42803f), 2013-01-01
Supplement: c3ra42803f.pdf [file c3ra42803f.pdf]

## **Cycloaddition of styrene oxide and CO<sub>2</sub> mediated by pyrolysis of urea**

**Jose Tharun, Dong Woo Kim, Roshith Roshan, Amal Cherian Kathalikkattil,  
Manickam Selvaraj and Dae-Won Park\***

Division of Chemical and Biomolecular Engineering, Pusan National University, Busan 609-735, Korea.

Fax: +82 51 512 8563; Tel: +82 51 510 2399;

\*E-mail: [dwpark@pusan.ac.kr](mailto:dwpark@pusan.ac.kr)

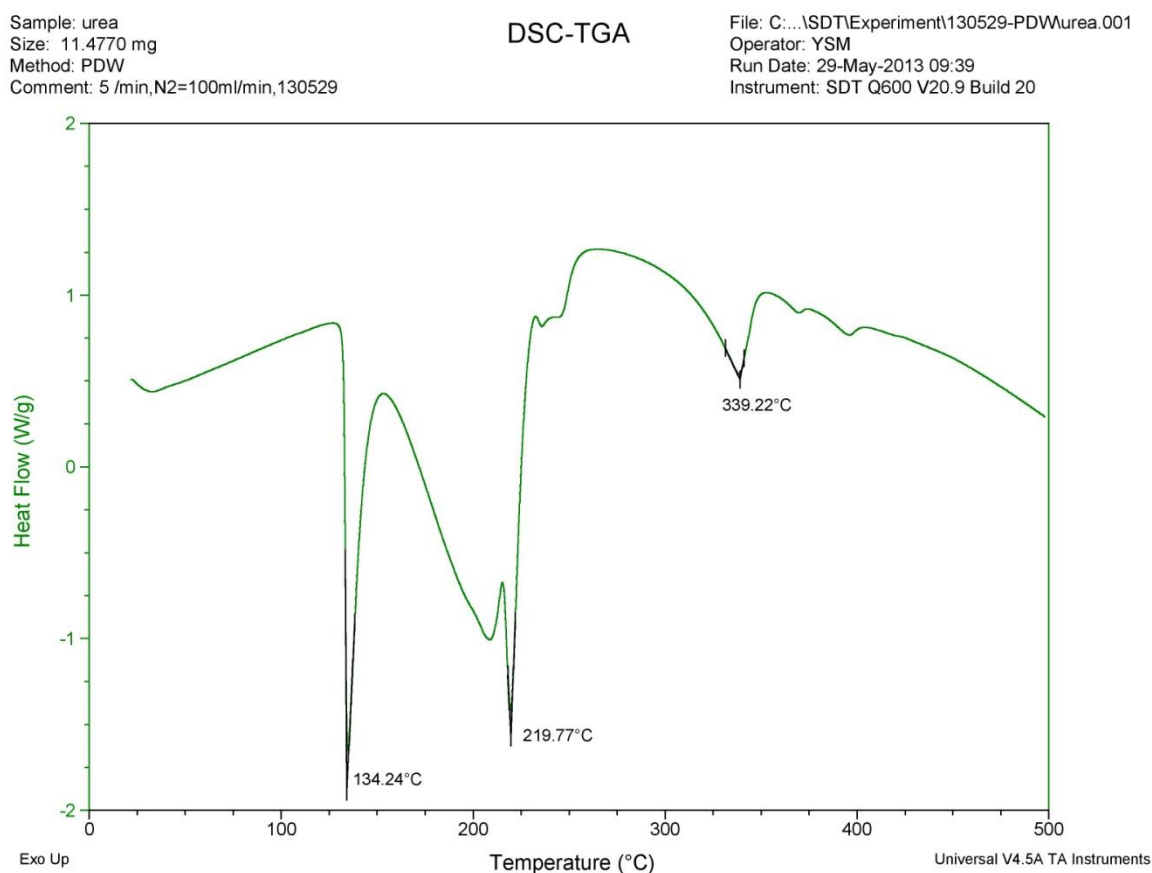

**Fig. S1** DSC-TGA analysis of urea

Weight loss begins at approximately 134 °C as observed from the TGA (Fig. S1). The loss is associated primarily with urea vaporization. This clearly confirms the formation of intermediate ammonium cyanate.
